# Supplementary material
Source: publisher figshare collection journal article supplement (https://tandf.figshare.com/ndownloader/files/20758953)
Supplement: Supplementary file 1 [file 20758953]

**SURVEY: FACILLITATORS AND BARRIERS TO INDEPENDENT TRANSFERS**

**Section 1- Home Environment: Features**

The following questions are about transfers in your **HOME** environment.

You will be asked how much each environmental feature below influences your participation in doing activities in the home where transfers are involved (e.g. bathing, toileting, relaxing, sleeping). You will also be asked to comment on how often you encounter the feature in your home. Please mark the choice that is closest to your experience. If the feature is not present in your home, select 'N/A' - not applicable.

**In your home, do the following influence your participation in activities where transfers are involved?**

| **1. Transferring to a surface that is higher than your mobility device seat** | |
| --- | --- |
| 🞅 Yes | How much? 🞅 *Helps a lot* 🞅 *Helps some* 🞅 *Limits some* 🞅 *Limits a lot*  How often? 🞅 *Daily* 🞅 *Weekly* 🞅 *Monthly* 🞅*Less than monthly* |
| 🞅 No | Moving to a surface that is higher does not influence my participation |
| 🞅 N/A | Do not have surfaces that are higher in my home |

| **2. Amount of space available next to the transfer surface to position your mobility device** | |
| --- | --- |
| 🞅 Yes | How much? 🞅 *Helps a lot* 🞅 *Helps some* 🞅 *Limits some* 🞅 *Limits a lot*  How often? 🞅 *Daily* 🞅 *Weekly* 🞅 *Monthly* 🞅*Less than monthly* |
| 🞅 No | Amount of space does not influence my participation |

| **3. Grab bars or handhelds** | |
| --- | --- |
| 🞅 Yes | How much? 🞅 *Helps a lot* 🞅 *Helps some* 🞅 *Limits some* 🞅 *Limits a lot*  How often? 🞅 *Daily* 🞅 *Weekly* 🞅 *Monthly* 🞅*Less than monthly* |
| 🞅 No | Grab bars or handhelds do not influence my participation |
| 🞅 N/A | Do not have them in my home |

| **4. Soft transfer surfaces** | |
| --- | --- |
| 🞅 Yes | How much? 🞅 *Helps a lot* 🞅 *Helps some* 🞅 *Limits some* 🞅 *Limits a lot*  How often? 🞅 *Daily* 🞅 *Weekly* 🞅 *Monthly* 🞅*Less than monthly* |
| 🞅 No | Soft transfer surfaces do not influence my participation |
| 🞅 N/A | Do not have them in my home |

| **5. Size of the transfer surface** | |
| --- | --- |
| 🞅 Yes | How much? 🞅 *Helps a lot* 🞅 *Helps some* 🞅 *Limits some* 🞅 *Limits a lot*  How often? 🞅 *Daily* 🞅 *Weekly* 🞅 *Monthly* 🞅*Less than monthly* |
| 🞅 No | The size of the transfer surface does not influence my participation |

| **6. Clearance for feet and/or legs** | |
| --- | --- |
| 🞅 Yes | How much? 🞅 *Helps a lot* 🞅 *Helps some* 🞅 *Limits some* 🞅 *Limits a lot*  How often? 🞅 *Daily* 🞅 *Weekly* 🞅 *Monthly* 🞅*Less than monthly* |
| 🞅 No | Clearance for feet and/or legs does not influence my participation |

| **7. Having a place to store your mobility device after you have completed the transfer** | |
| --- | --- |
| 🞅 Yes | How much? 🞅 *Helps a lot* 🞅 *Helps some* 🞅 *Limits some* 🞅 *Limits a lot*  How often? 🞅 *Daily* 🞅 *Weekly* 🞅 *Monthly* 🞅*Less than monthly* |
| 🞅 No | Having a place to store my mobility device does not influence my participation |

| **8. Transfer aids (e.g. sliding/transfer board or lift)** | |
| --- | --- |
| 🞅 Yes | How much? 🞅 *Helps a lot* 🞅 *Helps some* 🞅 *Limits some* 🞅 *Limits a lot*  How often? 🞅 *Daily* 🞅 *Weekly* 🞅 *Monthly* 🞅*Less than monthly* |
| 🞅 No | Transfer aids do not influence my participation |
| 🞅 N/A | Do not have any transfer aids in my home |

**Section 2- Community Environment: Features**

The following questions are about transfers in your **COMMUNITY** environment.

You will be asked how much each feature below influences your participation in doing activities in the community. You will also be asked to comment on how often you encounter the feature in your community. Please mark the choice that is closest to your experience. If the feature is not present in your community, select 'N/A' - not applicable.

**In your community, do the following influence your participation in activities where transfers are involved?**

| **1. Transferring to a surface that is higher than your mobility device seat** | |
| --- | --- |
| 🞅 Yes | How much? 🞅 *Helps a lot* 🞅 *Helps some* 🞅 *Limits some* 🞅 *Limits a lot*  How often? 🞅 *Daily* 🞅 *Weekly* 🞅 *Monthly* 🞅*Less than monthly* |
| 🞅 No | Moving to a surface that is higher does not influence my participation |
| 🞅 N/A | Do not have surfaces that are higher in my community |

| **2. Amount of space available next to the transfer surface to position your mobility device** | |
| --- | --- |
| 🞅 Yes | How much? 🞅 *Helps a lot* 🞅 *Helps some* 🞅 *Limits some* 🞅 *Limits a lot*  How often? 🞅 *Daily* 🞅 *Weekly* 🞅 *Monthly* 🞅*Less than monthly* |
| 🞅 No | Amount of space does not influence my participation |

| **3. Grab bars or handhelds** | |
| --- | --- |
| 🞅 Yes | How much? 🞅 *Helps a lot* 🞅 *Helps some* 🞅 *Limits some* 🞅 *Limits a lot*  How often? 🞅 *Daily* 🞅 *Weekly* 🞅 *Monthly* 🞅*Less than monthly* |
| 🞅 No | Grab bars or handhelds do not influence my participation |
| 🞅 N/A | Do not have them in my community |

| **4. Soft transfer surfaces** | |
| --- | --- |
| 🞅 Yes | How much? 🞅 *Helps a lot* 🞅 *Helps some* 🞅 *Limits some* 🞅 *Limits a lot*  How often? 🞅 *Daily* 🞅 *Weekly* 🞅 *Monthly* 🞅*Less than monthly* |
| 🞅 No | Soft transfer surfaces do not influence my participation |
| 🞅 N/A | Do not have them in my community |

| **5. Size of the transfer surface** | |
| --- | --- |
| 🞅 Yes | How much? 🞅 *Helps a lot* 🞅 *Helps some* 🞅 *Limits some* 🞅 *Limits a lot*  How often? 🞅 *Daily* 🞅 *Weekly* 🞅 *Monthly* 🞅*Less than monthly* |
| 🞅 No | The size of the transfer surface does not influence my participation |

| **6. Clearance for feet and/or legs** | |
| --- | --- |
| 🞅 Yes | How much? 🞅 *Helps a lot* 🞅 *Helps some* 🞅 *Limits some* 🞅 *Limits a lot*  How often? 🞅 *Daily* 🞅 *Weekly* 🞅 *Monthly* 🞅*Less than monthly* |
| 🞅 No | Clearance for feet and/or legs does not influence my participation |

| **7. Having a place to store your mobility device after you have completed the transfer** | |
| --- | --- |
| 🞅 Yes | How much? 🞅 *Helps a lot* 🞅 *Helps some* 🞅 *Limits some* 🞅 *Limits a lot*  How often? 🞅 *Daily* 🞅 *Weekly* 🞅 *Monthly* 🞅*Less than monthly* |
| 🞅 No | Having a place to store my mobility device does not influence my participation |

| **8. Transfer aids (e.g. sliding/transfer board or lift)** | |
| --- | --- |
| 🞅 Yes | How much? 🞅 *Helps a lot* 🞅 *Helps some* 🞅 *Limits some* 🞅 *Limits a lot*  How often? 🞅 *Daily* 🞅 *Weekly* 🞅 *Monthly* 🞅*Less than monthly* |
| 🞅 No | Transfer aids do not influence my participation |
| 🞅 N/A | Do not use transfer aids in my community |

**Section 3- Community Destination Access**

The following questions relate to how the accessibility of performing transfers in the following places influences your participation in doing activities at selected sites in your community.

In this section accessibility refers to your ability to perform a transfer in the various places listed.

If you perform transfers at the specified site and find it to be accessible, your response would either be "*Helps some*" or "*Helps a lot*".

If you find a site inaccessible to enabling you to perform a transfer when you need or desire to do so your response would be marked "*Limits some*" or "*Limits a lot*." If transferring at a site limits your participation (doing activities at a site), then you will be asked to check those barriers that limit or keep you from being able to transfer.

If the accessibility of a site does not facilitate or hinders your participation in activities taking place there, mark "*Has no effect*".

If you go to the site but do not need or desire to transfer (e.g. can remain in your wheelchair to receive a service or perform an activity at the site) or you do not go to a particular site please mark the appropriate response.

| 1. How does the accessibility of transferring in a **doctor’s or dentist's office** influence your participation in healthcare? |
| --- |
| 🞅 Helps a lot 🞅 Helps some 🞅 Has no effect 🞅 Limits some 🞅 Limits a lot  🞅 Go to the doctor but do not need or desire to transfer -- Go to next question  🞅 Do not go to a doctor -- Go to next question  ******************************  Is access **limited by**… **(Check all that apply)**  🞏 Height of transfer surfaces 🞏 Lack of grab bars/handhelds 🞏 Amount of space available  🞏 Stability of the transfer surface 🞏 Firmness of transfer surface 🞏 Size of the transfer surface 🞏 Clearance needed for feet/legs 🞏 Time to transfer 🞏 Fear of falling 🞏 None of these |

| 2. How does the accessibility of transferring to a **medical imaging or exam table** influence your participation in medical services? |
| --- |
| 🞅 Helps a lot 🞅 Helps some 🞅 Has no effect 🞅 Limits some 🞅 Limits a lot  🞅 Obtain these services but do not need or desire to transfer-- Go to next question  🞅 Do not obtain imaging services-- Go to next question  ******************************  **Is access limited by… (Check all that apply)**  🞏 Height of transfer surfaces 🞏 Lack of grab bars/handhelds 🞏 Amount of space available  🞏 Stability of the transfer surface 🞏 Firmness of transfer surface 🞏 Size of the transfer surface 🞏 Clearance needed for feet/legs 🞏 Time to transfer 🞏 Fear of falling 🞏 None of these |

| 3. How does the accessibility of transferring into a **pool or hot tub** influence your participation in swimming/relaxation? |
| --- |
| 🞅 Helps a lot 🞅 Helps some 🞅 Has no effect 🞅 Limits some 🞅 Limits a lot  🞅 Do not go to pools and hot tubs-- Go to next question  ******************************  **Is access limited by… (Check all that apply)**  🞏 Height of transfer surfaces 🞏 Lack of grab bars/handhelds 🞏 Amount of space available  🞏 Stability of the transfer surface 🞏 Firmness of transfer surface 🞏 Size of the transfer surface 🞏 Clearance needed for feet/legs 🞏 Time to transfer 🞏 Fear of falling 🞏 None of these |

| 4.How does the accessibility of transferring in your **religious institution or place of worship** influence your participation in religious activities? |
| --- |
| 🞅 Helps a lot 🞅 Helps some 🞅 Has no effect 🞅 Limits some 🞅 Limits a lot  🞅 Go to these places but do not need or desire to transfer -- Go to next question  🞅 Do not go to a religious institution or place of worship-- Go to next question  ******************************  **Is access limited by… (Check all that apply)**  🞏 Height of transfer surfaces 🞏 Lack of grab bars/handhelds 🞏 Amount of space available  🞏 Stability of the transfer surface 🞏 Firmness of transfer surface 🞏 Size of the transfer surface 🞏 Clearance needed for feet/legs 🞏 Time to transfer 🞏 Fear of falling 🞏 None of these |

| 5. How does the accessibility of transferring in a **fast food restaurant** influence your participation in dining out? |
| --- |
| 🞅 Helps a lot 🞅 Helps some 🞅 Has no effect 🞅 Limits some 🞅 Limits a lot  🞅 Go to fast food restaurants but do not need or desire to transfer -- Go to next question  🞅 Do not go to fast food restaurants-- Go to next question  ******************************  **Is access limited by… (Check all that apply)**  🞏 Height of transfer surfaces 🞏 Lack of grab bars/handhelds 🞏 Amount of space available  🞏 Stability of the transfer surface 🞏 Firmness of transfer surface 🞏 Size of the transfer surface 🞏 Clearance needed for feet/legs 🞏 Time to transfer 🞏 Fear of falling 🞏 None of these |

| 6. How does the accessibility of transferring in **other restaurants** (non fast food) influence your participation in dining out? |
| --- |
| 🞅 Helps a lot 🞅 Helps some 🞅 Has no effect 🞅 Limits some 🞅 Limits a lot  🞅 Go to other restaurants but do not need or desire to transfer -- Go to next question  🞅 Do not go to other restaurants-- Go to next question  ******************************  **Is access limited by… (Check all that apply)**  🞏 Height of transfer surfaces 🞏 Lack of grab bars/handhelds 🞏 Amount of space available  🞏 Stability of the transfer surface 🞏 Firmness of transfer surface 🞏 Size of the transfer surface 🞏 Clearance needed for feet/legs 🞏 Time to transfer 🞏 Fear of falling 🞏 None of these |

| 7. How does the accessibility of transferring in **movie theaters** influence your participation in going to the movies? |
| --- |
| 🞅 Helps a lot 🞅 Helps some 🞅 Has no effect 🞅 Limits some 🞅 Limits a lot  🞅 Go to movie theaters but do not need or desire to transfer -- Go to next question  🞅 Do not go to movie theaters-- Go to next question  ******************************  **Is access limited by… (Check all that apply)**  🞏 Height of transfer surfaces 🞏 Lack of grab bars/handhelds 🞏 Amount of space available  🞏 Stability of the transfer surface 🞏 Firmness of transfer surface 🞏 Size of the transfer surface 🞏 Clearance needed for feet/legs 🞏 Time to transfer 🞏 Fear of falling 🞏 None of these |

| 8. How does the accessibility of transferring in **sports arenas** influence your participation in going to sporting events? |
| --- |
| 🞅 Helps a lot 🞅 Helps some 🞅 Has no effect 🞅 Limits some 🞅 Limits a lot  🞅 Go to sport arenas but do not need or desire to transfer -- Go to next question  🞅 Do not go to sports arenas-- Go to next question  ******************************  **Is access limited by… (Check all that apply)**  🞏 Height of transfer surfaces 🞏 Lack of grab bars/handhelds 🞏 Amount of space available  🞏 Stability of the transfer surface 🞏 Firmness of transfer surface 🞏 Size of the transfer surface 🞏 Clearance needed for feet/legs 🞏 Time to transfer 🞏 Fear of falling 🞏 None of these |

| 9. How does the accessibility of transferring in a **dressing room in a clothing store** influence your participation in shopping for clothes? |
| --- |
| 🞅 Helps a lot 🞅 Helps some 🞅 Has no effect 🞅 Limits some 🞅 Limits a lot  🞅 Go to clothing stores but do not need or desire to transfer-- Go to next question  🞅 Do not go to clothing stores-- Go to next question  ******************************  **Is access limited by… (Check all that apply)**  🞏 Height of transfer surfaces 🞏 Lack of grab bars/handhelds 🞏 Amount of space available  🞏 Stability of the transfer surface 🞏 Firmness of transfer surface 🞏 Size of the transfer surface 🞏 Clearance needed for feet/legs 🞏 Time to transfer 🞏 Fear of falling 🞏 None of these |

| 10. How does the accessibility of transferring in **public parks** influence your participation in outdoor activities? |
| --- |
| 🞅 Helps a lot 🞅 Helps some 🞅 Has no effect 🞅 Limits some 🞅 Limits a lot  🞅 Go to public parks but do not need or desire to transfer -- Go to next question  🞅Do not go to public parks-- Go to next question  ******************************  **Is access limited by… (Check all that apply)**  🞏 Height of transfer surfaces 🞏 Lack of grab bars/handhelds 🞏 Amount of space available  🞏 Stability of the transfer surface 🞏 Firmness of transfer surface 🞏 Size of the transfer surface 🞏 Clearance needed for feet/legs 🞏 Time to transfer 🞏 Fear of falling 🞏 None of these |

| 11. How does the accessibility of transferring in a **recreation facility** influence your participation in fitness and recreational activities? |
| --- |
| 🞅 Helps a lot 🞅 Helps some 🞅 Has no effect 🞅 Limits some 🞅 Limits a lot  🞅 Go to recreational facilities but do not need or desire to transfer-- Go to next question  🞅Do not go to recreation facilities-- Go to next question  ******************************  **Is access limited by… (Check all that apply)**  🞏 Height of transfer surfaces 🞏 Lack of grab bars/handhelds 🞏 Amount of space available  🞏 Stability of the transfer surface 🞏 Firmness of transfer surface 🞏 Size of the transfer surface 🞏 Clearance needed for feet/legs 🞏 Time to transfer 🞏 Fear of falling 🞏 None of these |

| 12. How does the accessibility of transferring in **hotels** influence your participation in travel? |
| --- |
| 🞅 Helps a lot 🞅 Helps some 🞅 Has no effect 🞅 Limits some 🞅 Limits a lot  🞅 Go to hotels but do not need or desire to transfer-- Go to next question  🞅 Do not go to hotels-- Go to next question  ******************************  **Is access limited by… (Check all that apply)**  🞏 Height of transfer surfaces 🞏 Lack of grab bars/handhelds 🞏 Amount of space available  🞏 Stability of the transfer surface 🞏 Firmness of transfer surface 🞏 Size of the transfer surface 🞏 Clearance needed for feet/legs 🞏 Time to transfer 🞏 Fear of falling 🞏 None of these |

| 13. How does the accessibility of transferring on an **airplane** influence your participation in travel? |
| --- |
| 🞅 Helps a lot 🞅 Helps some 🞅 Has no effect 🞅 Limits some 🞅 Limits a lot  🞅 Go on airplanes but do not need or desire to transfer-- Go to next question  🞅 Do not go on airplanes-- Go to next question  ******************************  **Is access limited by… (Check all that apply)**  🞏 Height of transfer surfaces 🞏 Lack of grab bars/handhelds 🞏 Amount of space available  🞏 Stability of the transfer surface 🞏 Firmness of transfer surface 🞏 Size of the transfer surface 🞏 Clearance needed for feet/legs 🞏 Time to transfer 🞏 Fear of falling 🞏 None of these |

| 14. How does the accessibility of transferring in a **hair/nail salon** **or barber shop** influence your participation in obtaining hair and/or nail services? |
| --- |
| 🞅 Helps a lot 🞅 Helps some 🞅 Has no effect 🞅 Limits some 🞅 Limits a lot  🞅 Go to salon or barber shop but do not need or desire to transfer-- Go to next question  🞅 Do not go to salons or barber shop-- Go to next question  ******************************  **Is access limited by… (Check all that apply)**  🞏 Height of transfer surfaces 🞏 Lack of grab bars/handhelds 🞏 Amount of space available  🞏 Stability of the transfer surface 🞏 Firmness of transfer surface 🞏 Size of the transfer surface 🞏 Clearance needed for feet/legs 🞏 Time to transfer 🞏 Fear of falling 🞏 None of these |

| 15. How does the accessibility of transferring in **amusement parks** influence your participation in activities at amusement parks? |
| --- |
| 🞅 Helps a lot 🞅 Helps some 🞅 Has no effect 🞅 Limits some 🞅 Limits a lot  🞅 Go to amusement parks but do not need or desire to transfer-- Go to next question  🞅 Do not go to amusement parks-- Go to next question  ******************************  **Is access limited by… (Check all that apply)**  🞏 Height of transfer surfaces 🞏 Lack of grab bars/handhelds 🞏 Amount of space available  🞏 Stability of the transfer surface 🞏 Firmness of transfer surface 🞏 Size of the transfer surface 🞏 Clearance needed for feet/legs 🞏 Time to transfer 🞏 Fear of falling 🞏 None of these |

| 16. How does the accessibility of transferring at **school** influence your participation in educational activities? |
| --- |
| 🞅 Helps a lot 🞅 Helps some 🞅 Has no effect 🞅 Limits some 🞅 Limits a lot  🞅 Go to school but do not need or desire to transfer-- Go to next question  🞅Do not go to school-- Go to next question  ******************************  **Is access limited by… (Check all that apply)**  🞏 Height of transfer surfaces 🞏 Lack of grab bars/handhelds 🞏 Amount of space available  🞏 Stability of the transfer surface 🞏 Firmness of transfer surface 🞏 Size of the transfer surface 🞏 Clearance needed for feet/legs 🞏 Time to transfer 🞏 Fear of falling 🞏 None of these |

| 17. How does the accessibility of transferring in your **place of work** influence your participation in vocational activities? |
| --- |
| 🞅 Helps a lot 🞅 Helps some 🞅 Has no effect 🞅 Limits some 🞅 Limits a lot  🞅 Go to work but do not need or desire to transfer-- Go to next question  🞅Do not go to work-- Go to next question  ******************************  **Is access limited by… (Check all that apply)**  🞏 Height of transfer surfaces 🞏 Lack of grab bars/handhelds 🞏 Amount of space available  🞏 Stability of the transfer surface 🞏 Firmness of transfer surface 🞏 Size of the transfer surface 🞏 Clearance needed for feet/legs 🞏 Time to transfer 🞏 Fear of falling 🞏 None of these |

| 18. How does the accessibility of transferring in **boating areas** influence your participation in boating and marine activities? |
| --- |
| 🞅 Helps a lot 🞅 Helps some 🞅 Has no effect 🞅 Limits some 🞅 Limits a lot  🞅 Go to boating areas but do not need or desire to transfer-- Go to next question  🞅 Do not go to boating areas-- Go to next question  ******************************  **Is access limited by… (Check all that apply)**  🞏 Height of transfer surfaces 🞏 Lack of grab bars/handhelds 🞏 Amount of space available  🞏 Stability of the transfer surface 🞏 Firmness of transfer surface 🞏 Size of the transfer surface 🞏 Clearance needed for feet/legs 🞏 Time to transfer 🞏 Fear of falling 🞏 None of these |

**Section 4- Community facilities accessibility**

For this question accessibility refers to your ability to perform transfers to toilets in public restrooms at the various facilities listed.

How accessible are transfers to **toilets** in the following places:

| **1. How accessible are transfers to TOILETS in the following places:** | **Very accessible** | **Somewhat accessible** | **Not accessible** | **Don’t know** | **Not applicable** |
| --- | --- | --- | --- | --- | --- |
| Doctors and dentist offices | 🞅 | 🞅 | 🞅 | 🞅 | 🞅 |
| Swimming pools | 🞅 | 🞅 | 🞅 | 🞅 | 🞅 |
| Religious institutions or places of worship | 🞅 | 🞅 | 🞅 | 🞅 | 🞅 |
| Fast food restaurants | 🞅 | 🞅 | 🞅 | 🞅 | 🞅 |
| Non fast food restaurants | 🞅 | 🞅 | 🞅 | 🞅 | 🞅 |
| Movie theaters | 🞅 | 🞅 | 🞅 | 🞅 | 🞅 |
| Sporting arenas | 🞅 | 🞅 | 🞅 | 🞅 | 🞅 |
| Malls and clothing stores | 🞅 | 🞅 | 🞅 | 🞅 | 🞅 |
| Hotels | 🞅 | 🞅 | 🞅 | 🞅 | 🞅 |
| Airplanes | 🞅 | 🞅 | 🞅 | 🞅 | 🞅 |
| Recreational Facilities | 🞅 | 🞅 | 🞅 | 🞅 | 🞅 |
| School | 🞅 | 🞅 | 🞅 | 🞅 | 🞅 |
| Work | 🞅 | 🞅 | 🞅 | 🞅 | 🞅 |

Overall how does the accessibility of performing transfers to **toilets in public places** influence your participation in activities?

🞅 Helps a lot

🞅 Help some

🞅 Has no effect

🞅 Limit some

🞅 Limit a lot

🞅 Do not use public toilets

For this question accessibility refers to your ability to perform transfers to exam and imaging tables or chairs in the various places listed.

How accessible are transfers to **exam and imaging tables or chairs** in the following places:

| **2. How accessible are transfers to EXAM and IMAGING TABLES in the following places:** | **Very accessible** | **Somewhat accessible** | **Not accessible** | **Don’t know** | **Not applicable** |
| --- | --- | --- | --- | --- | --- |
| Doctors offices | 🞅 | 🞅 | 🞅 | 🞅 | 🞅 |
| Dentist offices | 🞅 | 🞅 | 🞅 | 🞅 | 🞅 |
| Hospitals | 🞅 | 🞅 | 🞅 | 🞅 | 🞅 |
| Physical Therapy and Occupational Therapy clinics | 🞅 | 🞅 | 🞅 | 🞅 | 🞅 |
| MRI rooms | 🞅 | 🞅 | 🞅 | 🞅 | 🞅 |
| X-ray rooms | 🞅 | 🞅 | 🞅 | 🞅 | 🞅 |

Overall how does the accessibility of performing transfers to **exam and imaging tables** **and chairs** influence your participation in healthcare?

🞅 Helps a lot

🞅 Help some

🞅 Has no effect

🞅 Limit some

🞅 Limit a lot

🞅 Do not go to any of the places listed

For this question, accessibility refers to the ability to perform transfers to seats for the modes of transportation listed.

How accessible are transfers to **seats** for the following modes of **transportation**:

| **3. How accessible are transfers to SEATS for TRANSPORTATION in the following places:** | **Very accessible** | **Somewhat accessible** | **Not accessible** | **Don’t know** | **Not applicable** |
| --- | --- | --- | --- | --- | --- |
| Your own car/van | 🞅 | 🞅 | 🞅 | 🞅 | 🞅 |
| Another person's car/van | 🞅 | 🞅 | 🞅 | 🞅 | 🞅 |
| Taxis | 🞅 | 🞅 | 🞅 | 🞅 | 🞅 |
| Airplanes | 🞅 | 🞅 | 🞅 | 🞅 | 🞅 |
| Light rail/subways | 🞅 | 🞅 | 🞅 | 🞅 | 🞅 |
| Paratransit vehicles | 🞅 | 🞅 | 🞅 | 🞅 | 🞅 |
| Boats | 🞅 | 🞅 | 🞅 | 🞅 | 🞅 |

Overall how does the accessibility of performing transfers to **seats for transportation** influence your participation in activities?

🞅 Helps a lot

🞅 Help some

🞅 Has no effect

🞅 Limit some

🞅 Limit a lot

🞅 Do not use any of these modes of transportation

In this last question, accessibility refers to your ability to perform transfer to seats at desks and tables in the environments listed.

How accessible are **seats at** **desks and tables** in the following locations:

| **4. How accessible are transfers to SEATS at DESKS and TABLES in the following places:** | **Very accessible** | **Somewhat accessible** | **Not accessible** | **Don’t know** | **Not applicable** |
| --- | --- | --- | --- | --- | --- |
| Schools | 🞅 | 🞅 | 🞅 | 🞅 | 🞅 |
| Work facilities | 🞅 | 🞅 | 🞅 | 🞅 | 🞅 |
| Doctor's offices | 🞅 | 🞅 | 🞅 | 🞅 | 🞅 |
| Hospitals | 🞅 | 🞅 | 🞅 | 🞅 | 🞅 |
| Restaurants | 🞅 | 🞅 | 🞅 | 🞅 | 🞅 |
| Hotels | 🞅 | 🞅 | 🞅 | 🞅 | 🞅 |
| Schools | 🞅 | 🞅 | 🞅 | 🞅 | 🞅 |

Overall how does the accessibility of performing transfers to **seats at desks and tables** influence your participation in activities?

🞅 Helps a lot

🞅 Help some

🞅 Has no effect

🞅 Limit some

🞅 Limit a lot

🞅 Do not go to any of the locations listed

**Section 5- Assistance in the Community**

1. When performing transfers in the community how often do you use assistance?

🞅 All transfers performed

🞅 The majority of transfers performed

🞅 Some of the transfer performed

🞅 A few of the transfers performed

🞅 I do not use assistance to transfer in the community

2. Where do you use assistance to transfer in the community? (Check all that apply)

🞏 Non-fast food restaurants 🞏 Boating areas

🞏 Fast food restaurants 🞏Public Parks

🞏 Movie theaters 🞏 Hair/nail salons or barber shops

🞏 Religious institutions or places of worship

🞏 Public parks 🞏 Work

🞏 Doctor’s offices 🞏 School

🞏 Dentist offices 🞏 Amusement parks

🞏 Recreational facilities 🞏 Airplanes

🞏 Swimming pools 🞏 Hotels

🞏 Sporting arenas 🞏 Clothing stores

🞏Not applicable

______________________________________________________________________________

*THANK you for completing this survey!*
